# Supplementary material for: The Role of ATF3 in Neuronal Differentiation and Development of Neuronal Networks in Opossum Postnatal Cortical Cultures
Source: MDPI journal article supplement (doi:10.3390/ijms23094964), 2022-04-29
Supplement: s1 [file s1]

## SUPPLEMENTARY INFORMATION

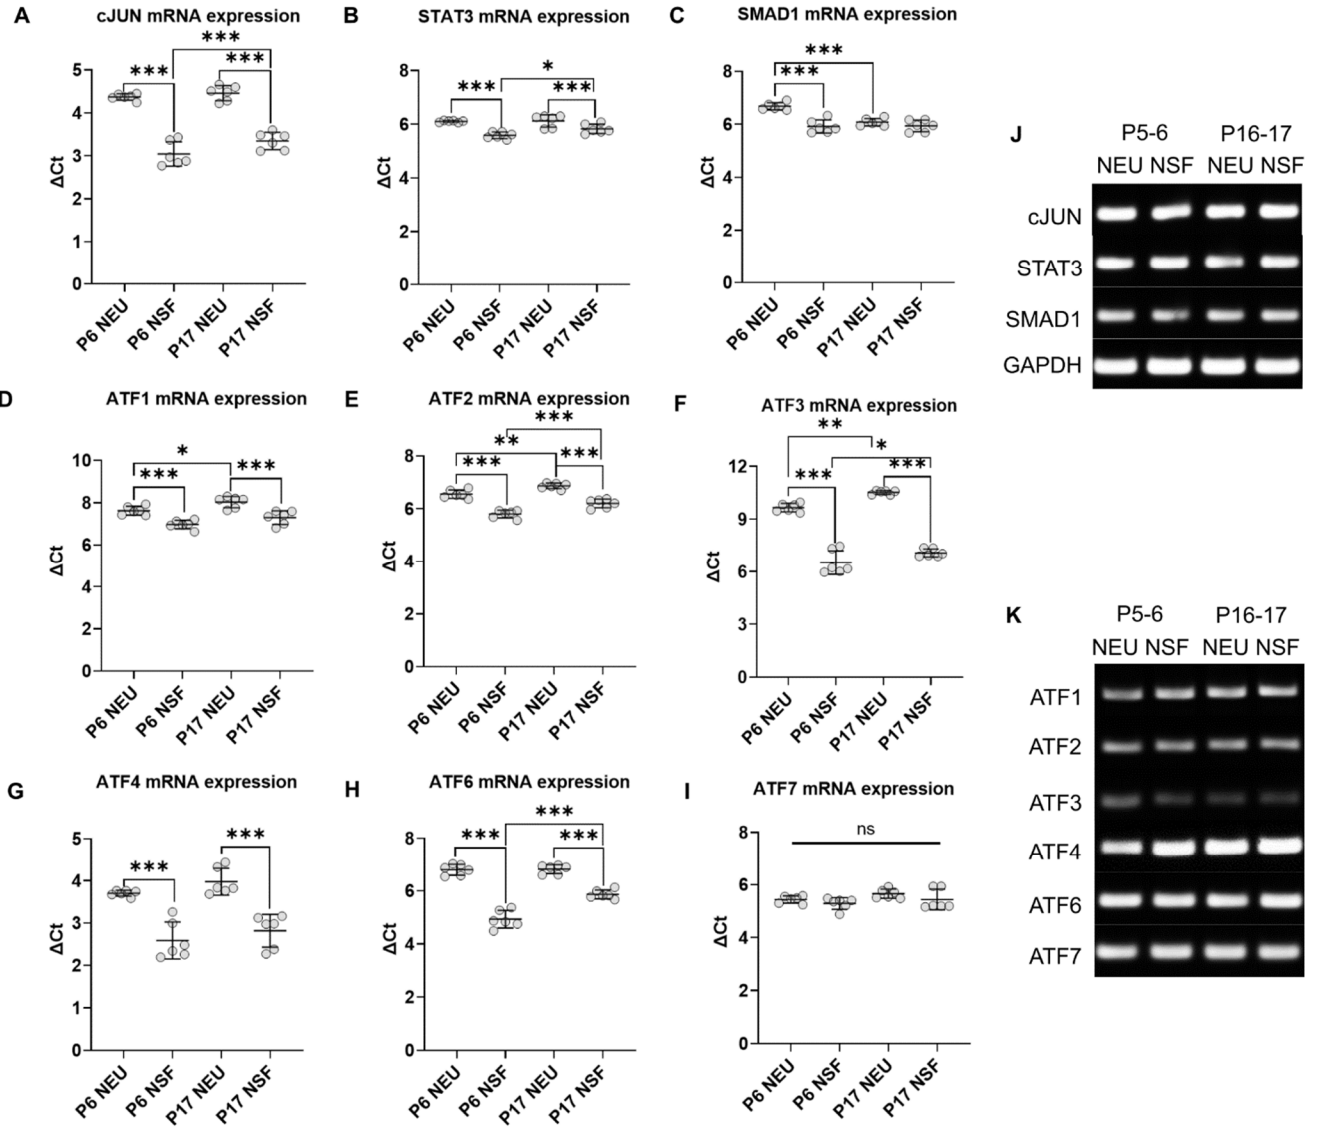

**Supplementary Figure S1. Relative mRNA expression normalized to GAPDH ( $\Delta$ Ct).** Scatter plots show mRNA levels measured by RT-PqCR, normalized to GAPDH, and expressed as  $\Delta$ Ct with mean  $\pm$  SD. **(A)** cJUN: ANOVA with Holm-Šídák test, P6 NEU vs. P6 NSF  $p < 0.001^{***}$ ; P17 NEU vs. P17 NSF  $p < 0.001^{***}$ ; P6 NSF vs. P17 NSF  $p = 0.03^*$ . **(B)** STAT3: ANOVA with Holm-Šídák test, P6 NEU vs. P6 NSF  $p < 0.001^{***}$ ; P17 NEU vs. P17 NSF  $p = 0.02^*$ ; P6 NSF vs. P17 NSF  $p = 0.03^*$ . **(C)** SMAD1: ANOVA with Holm-Šídák test, P6 NEU vs. P6 NSF  $p <$

0.001\*\*\*; P6 NEU vs. P17 NEU  $p < 0.001^{***}$ . **(D)** ATF1: ANOVA with Holm-Šídák test, P6 NEU vs. P6 NSF  $p < 0.001^{***}$ ; P17 NEU vs. P17 NSF  $p < 0.001^{***}$ ; P6 NEU vs. P17 NEU  $p = 0.03^*$ . **(E)** ATF2: ANOVA with Holm-Šídák test, P6 NEU vs. P6 NSF  $p < 0.001^{***}$ ; P17 NEU vs. P17 NSF  $p < 0.001^{***}$ ; P6 NSF vs. P17 NSF  $p < 0.001^{***}$ ; P6 NEU vs. P17 NEU  $p = 0.001^{**}$ . **(F)** ATF3: ANOVA with Holm-Šídák test, P6 NEU vs. P6 NSF  $p < 0.001^{***}$ ; P17 NEU vs. P17 NSF  $p < 0.001^{***}$ ; P6 NSF vs. P17 NSF  $p = 0.02^*$ ; P6 NEU vs. P17 NEU  $p = 0.002^{**}$ . **(G)** ATF4: ANOVA with Holm-Šídák test, P6 NEU vs. P6 NSF  $p < 0.001^{***}$ ; P17 NEU vs. P17 NSF  $p < 0.001^{***}$ . **(H)** ATF6: ANOVA with Holm-Šídák test, P6 NEU vs. P6 NSF  $p < 0.001^{***}$ ; P17 NEU vs. P17 NSF  $p < 0.001^{***}$ ; P6 NSF vs. P17 NSF  $p < 0.001^{***}$ . **(J, K)** Agarose gel electrophoresis of endpoint RT-qPCR products. mRNA from P5-6 and P16-17 opossum cortical neurons and neurospheres. GAPDH is reference gene.

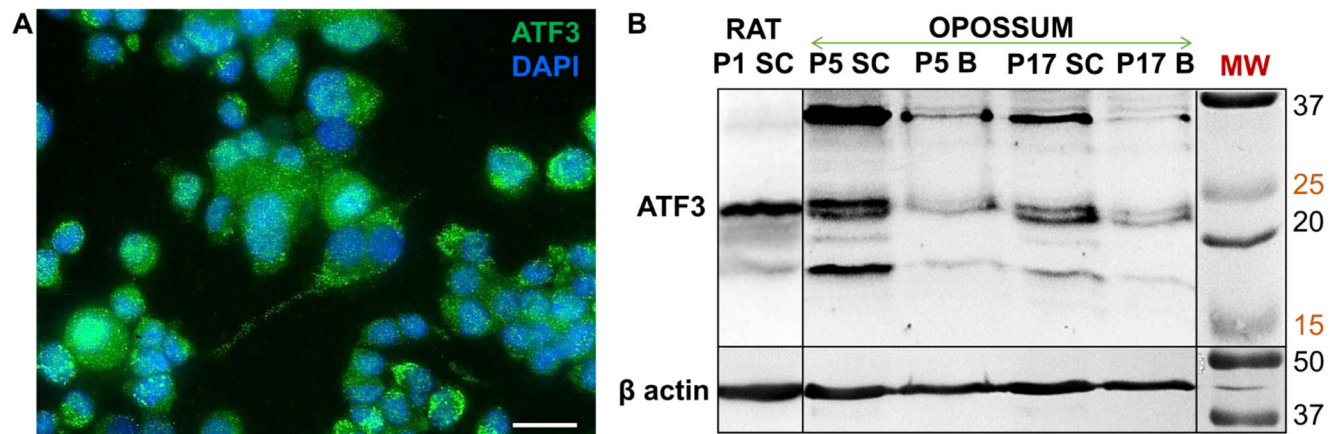

**Supplementary Figure S2. Validation of the ATF3 antibodies used in this study for immunocytochemistry and western blot. (A)** NSC34 cell line fixed at DIV7 and immunostained for ATF3 (green; ab216569). Cell nuclei were counterstained with DAPI (blue). Scale bar is 25

$\mu\text{m}$ . **(B)** ATF3 (C-19; sc-188) antibody tested on the neonatal rat spinal cord tissue (P1 SC), and neonatal opossum P5 and P17 brain (B) and spinal cord (SC) tissue.

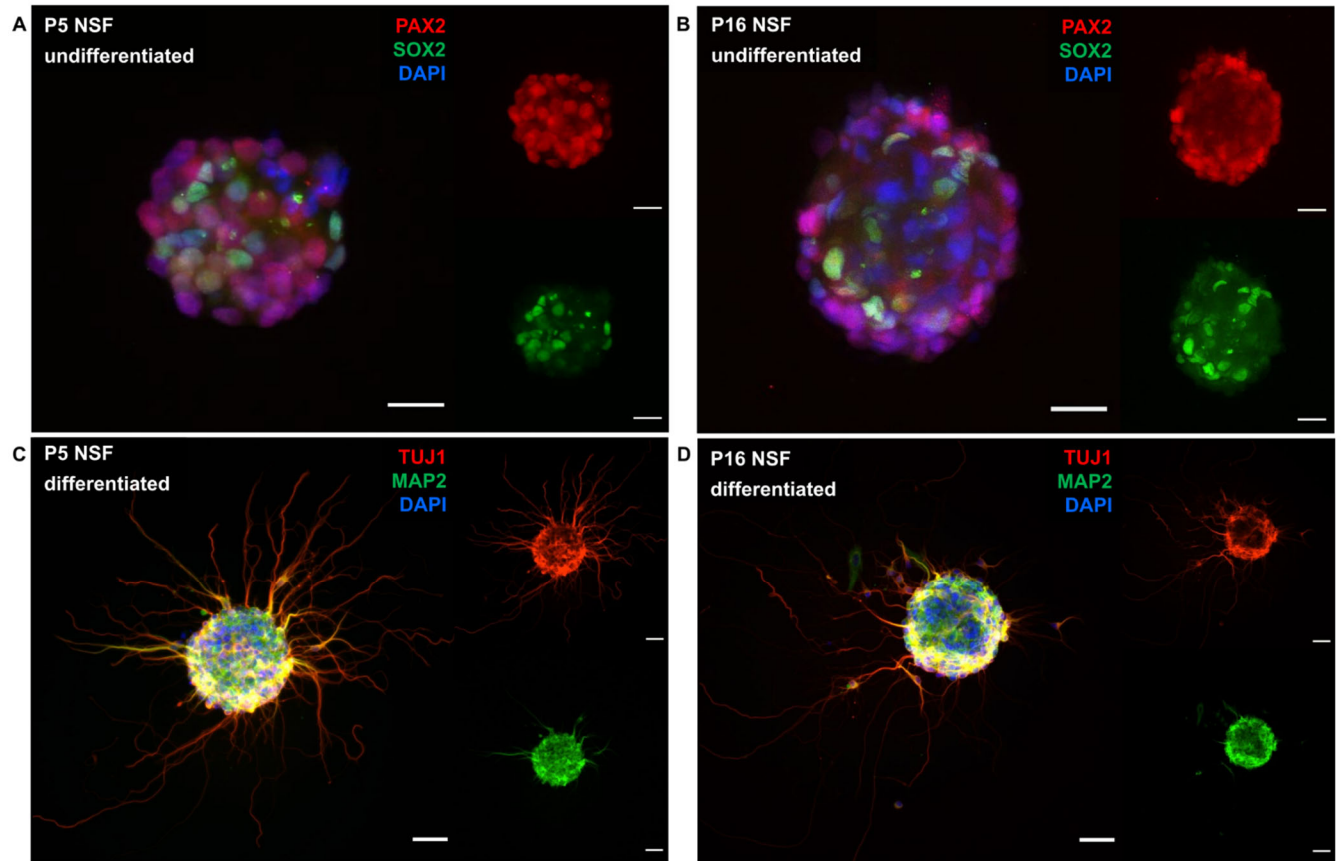

**Supplementary Figure S3. Neurogenic potential of neurospheres.** Neurospheres obtained from the cortex of neonatal opossums of different age groups, P5 (**A**, **C**) and (**B**, **D**) P16. P5 (**A**) and P16 (**B**) neurospheres were cultured in a proliferating media (DMEM/10%FBS) for a week. Neurospheres were fixed at DIV8 and immunostained for PAX2 (red), SOX2 (green) and nuclei were counterstained with DAPI (blue). Scale bar is 20  $\mu\text{m}$ . P5 (**C**) and P16 (**D**) neurospheres were transferred at DIV8 on poly-L-ornithine/laminin coated coverslips in a neuronal medium to differentiate for the additional week. Neurospheres were fixed at DIV15 and immunostained for TUJ1 (red), MAP2 (green) and nuclei were counterstained with DAPI (blue). Scale bar is 50  $\mu\text{m}$ .

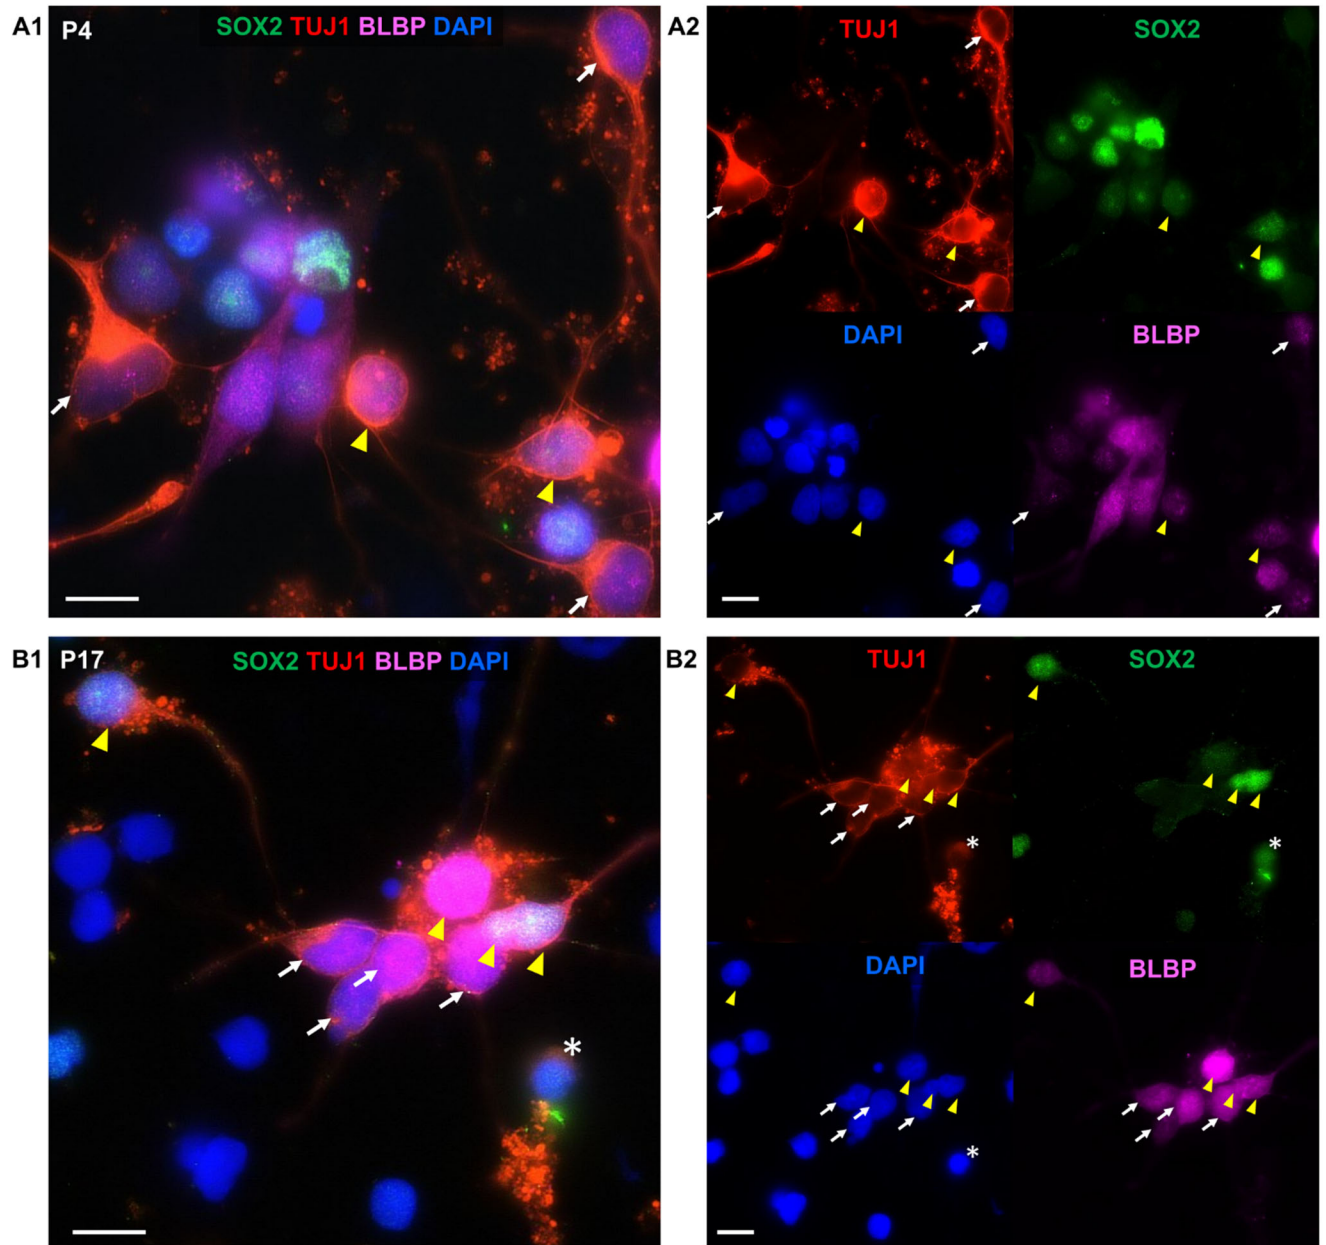

**Supplementary Figure S4. Expression of neuronal progenitor markers.** Cortical cultures are derived from P4 (**A1-2**) and P17 (**B1-2**) opossum. Cells were fixed at DIV2 and stained for TUJ1 (red), SOX2 (green), BLBP (magenta), and counterstained with DAPI nuclear stain (blue). Yellow arrowheads indicate TUJ1<sup>+</sup>/SOX2<sup>+</sup>/BLBP<sup>+</sup> neuronal progenitors, arrows indicate TUJ1<sup>+</sup>/SOX2<sup>-</sup>

/BLBP<sup>+</sup> neuronal progenitors, and asterisks indicate TUJ1<sup>+</sup>/SOX2<sup>+</sup>/BLBP<sup>-</sup> neuronal progenitors.

Scale bar is 10  $\mu$ m.

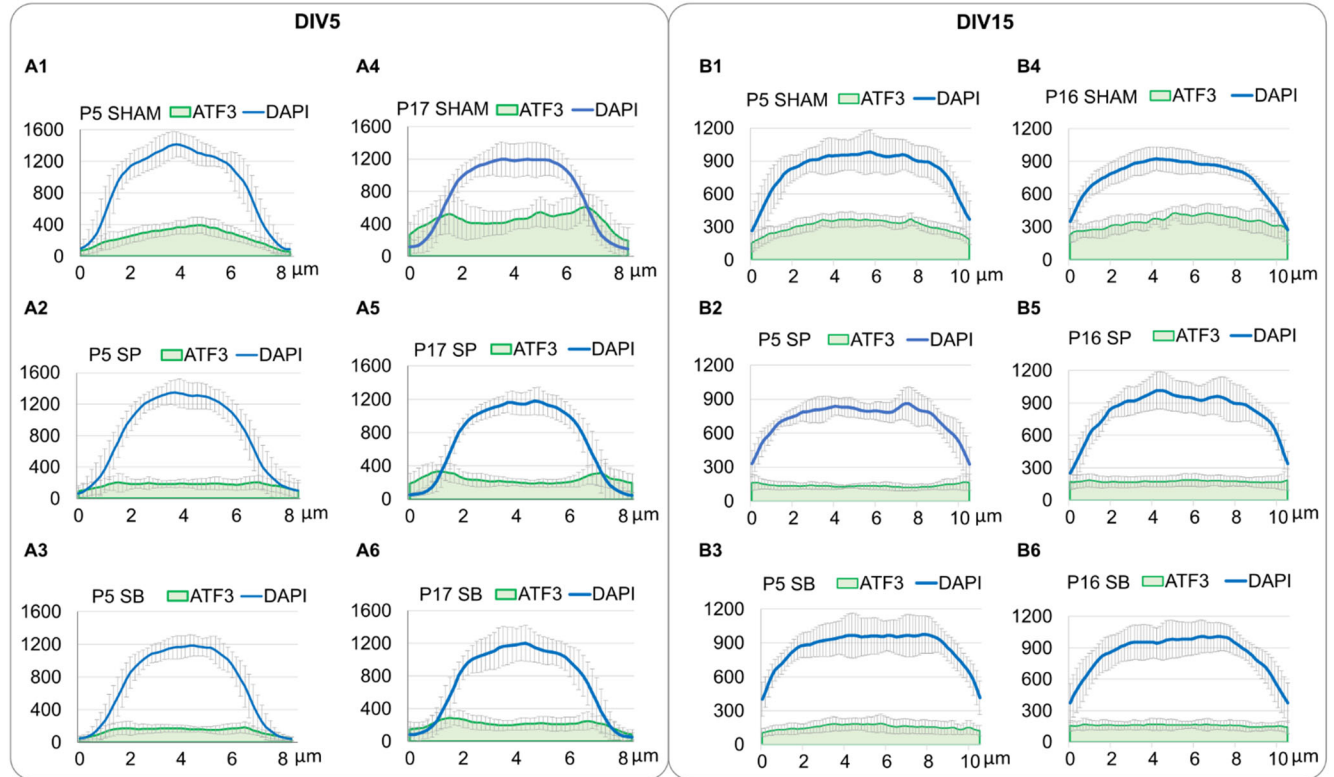

**Supplementary Figure S5. Line scan analysis of ATF3 and DAPI average fluorescence intensity in primary neurons. (A1-A3)** Line scan analysis of P5 primary neurons, and **(A4-A6)** P17 primary neurons at DIV5 for conditions: SHAM, SP and SB. **(B1-B3)** Line scan analysis of P5 primary neurons, and **(B4-B6)** P16 primary neurons at DIV15 for conditions: SHAM, SP and SB. Line scan analysis is performed on a Z-stack average intensity projection to obtain the plots in which ATF3 (green) and DAPI (blue) are shown (within the vertical lines on the plot is nucleus). The graph represents the average ATF3 and DAPI immunofluorescence intensity measured in 10-16 randomly selected neurons for each condition. Data are shown as mean  $\pm$  SD.



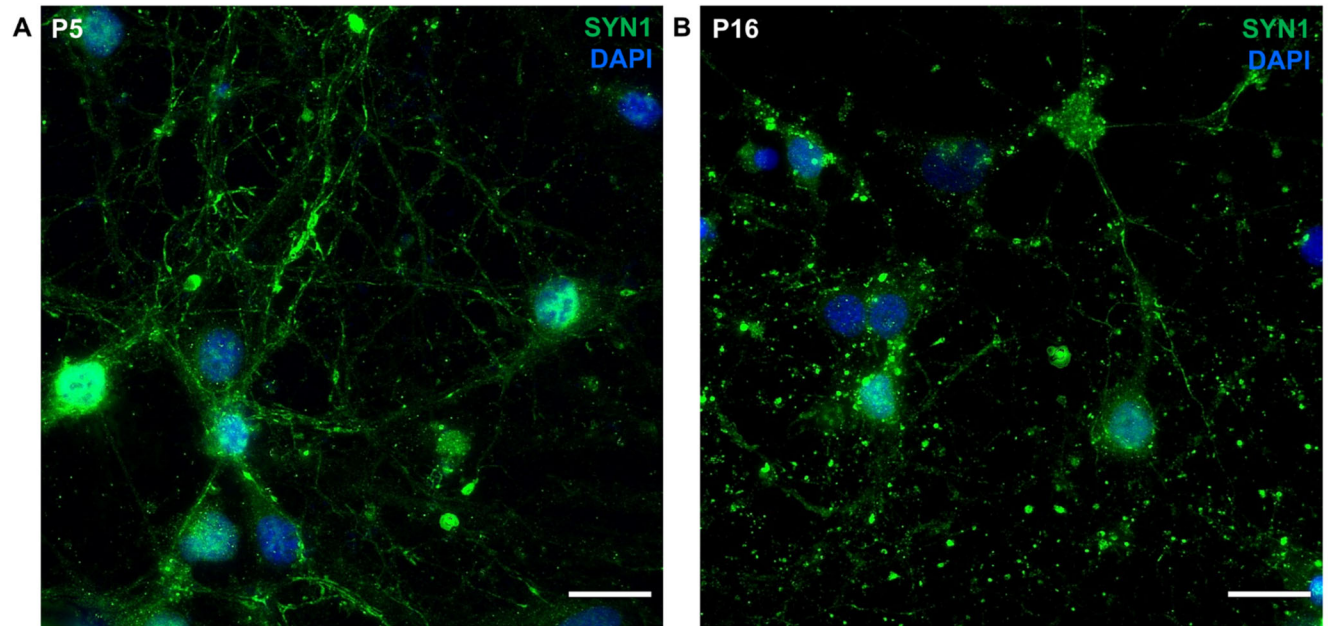

**Supplementary Figure S6. Expression of Synapsin 1 in neuronal cultures after two weeks *in vitro*.** P5 (**A**) and P16 (**B**) *M. domestica* primary cortical neuronal cultures were fixed at DIV15 and immunostained for Synapsin 1 (green). Cell nuclei were counterstained with DAPI (blue). Scale bar is 20  $\mu\text{m}$ .

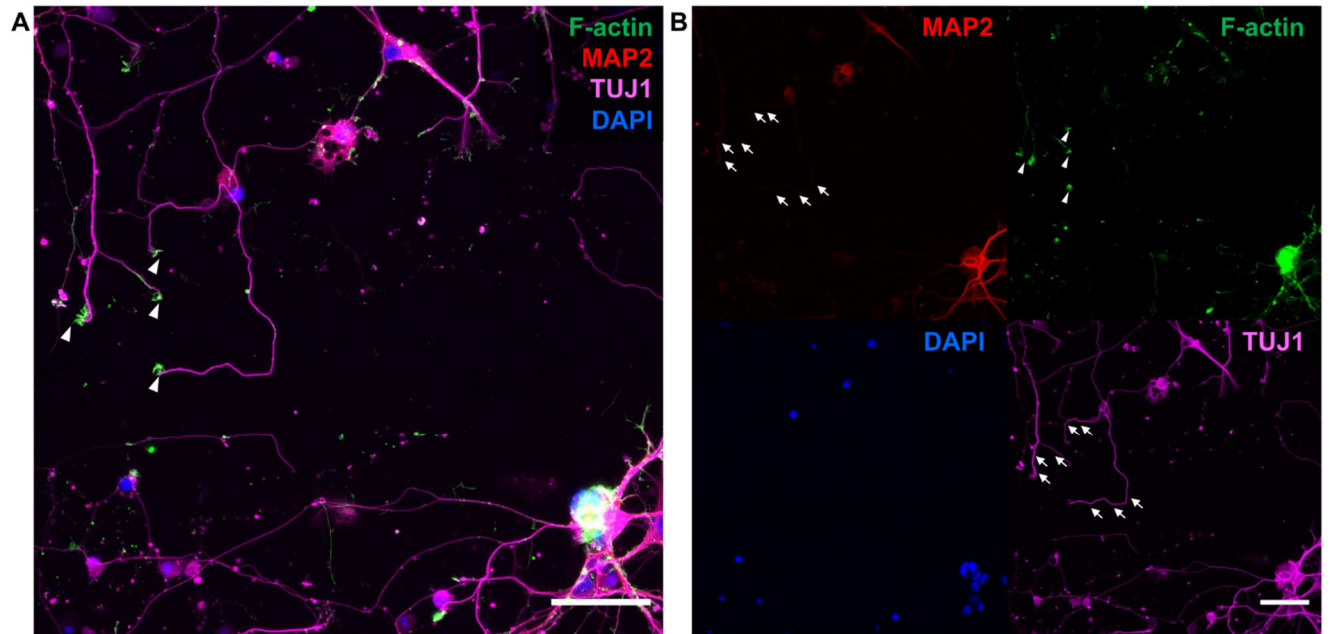

**Supplementary Figure S7. Growth cones formation and axonal regeneration after injury.**

**(A, B)** P5 opossum primary cortical neuronal cultures. Neurons were fixed after scratch at DIV16 and stained for MAP2 (red), F-actin (green), TUJ1 (magenta) and nuclei were counterstained with DAPI (blue). **(A)** Arrowheads indicate growth cones F-actin (green) after cut, stained with fluorescent phalloidin (Abcam, ab176753, 1:200). **(B)** White arrows indicate TUJ1<sup>+</sup>/MAP2<sup>-</sup> regenerating axons.

**Supplementary Table S1. Primary antibodies additional information**

| <b>Antibody</b>               | <b>Host and isotype</b>            | <b>Dilution</b> | <b>Immunogen</b>                                                                                | <b>Producer Catalog #<br/>RRID</b>         | <b>Uniprot Align<br/>Immunogen<br/>Identity</b> |
|-------------------------------|------------------------------------|-----------------|-------------------------------------------------------------------------------------------------|--------------------------------------------|-------------------------------------------------|
| <b>ATF3</b>                   | Rabbit polyclonal                  | 1:100           | C-terminus of ATF-3 of <b>human</b> origin                                                      | Santa Cruz Biotechnology sc-188 AB_2258513 | 92.3%                                           |
| <b>ATF3</b>                   | Rabbit polyclonal                  | 1:50            | Synthetic peptide within <b>human</b> ATF3 aa 50-150                                            | Abcam ab216569                             | 92.3%                                           |
| <b>BLBP</b>                   | Rabbit polyclonal                  | 1:200           | Synthetic peptide conjugated to KLH within residues 1 - 100 of <b>mouse</b> BLBP                | Abcam ab32423 AB_880078                    | 89.4%                                           |
| <b>MAP2</b>                   | Mouse monoclonal IgG <sub>1</sub>  | 1:200           | <b>Bovine</b> MAP2                                                                              | Sigma-Aldrich M1406 AB_477171              | 82.8%                                           |
| <b>PAX2</b>                   | Rabbit monoclonal IgG              | 1:50            | Synthetic peptide within <b>human</b> PAX2 aa 1-100                                             | Abcam ab79389 GR3222251-1                  | 94.5%                                           |
| <b>SOX2</b>                   | Mouse monoclonal IgG <sub>1</sub>  | 1:200           | Synthetic peptide corresponding to <b>human</b> SOX2 aa 300 to the C-terminus conjugated to KLH | Abcam ab79351 AB_10710406                  | 91.7%                                           |
| <b>Synapsin 1</b>             | Rabbit polyclonal                  | 1:100           | Synapsin I (mixture of Ia & Ib) purified from <b>bovine</b> brain.                              | Millipore AB1543 AB_2200400                | 72.3%                                           |
| <b>β - Tubulin III (TUJ1)</b> | Mouse monoclonal IgG <sub>2a</sub> | 1:200           | Microtubules derived from <b>rat</b> brain                                                      | Biolegend 801201 AB_2313773                | 99.8%                                           |
